# Supplementary material for: Effect of Targeted Cytokine Inhibition on Progression of Post-Traumatic Osteoarthritis Following Intra-Articular Fracture
Source: MDPI journal article supplement (doi:10.3390/ijms241713606), 2023-09-02
Supplement: s1 [file s1]

**A**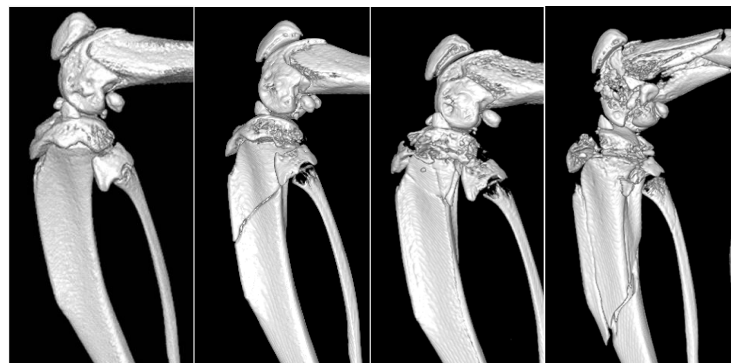

No Fracture

Non-Articular  
FractureIntraarticular  
Fracture (IAF)Multi-  
Fragmentary  
IAF

Fracture Intensity

**B**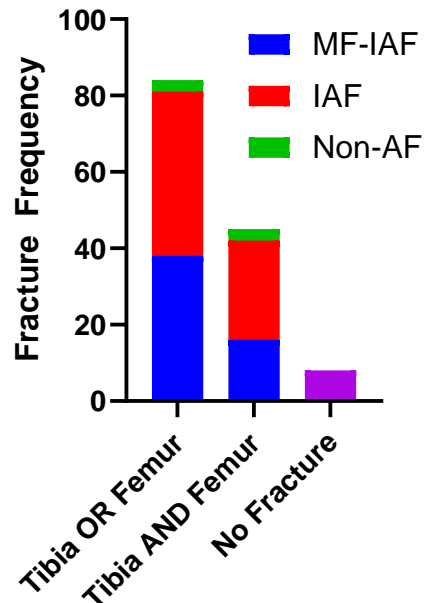**C**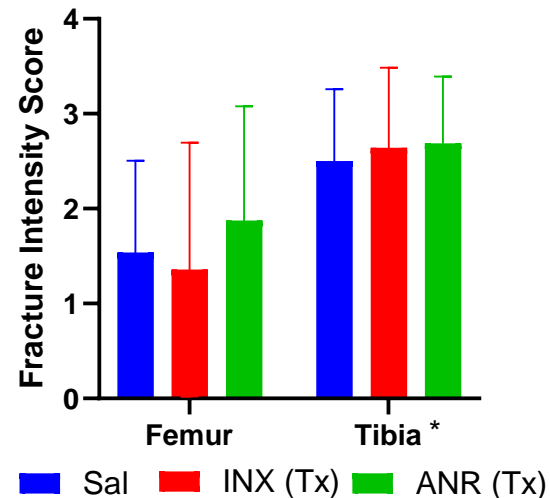

Supplemental Figure 1: Effect of Impact-Induced Trauma on IAF Generation and Fracture Intensity. (A) Representative images of the types of fractures induced by blunt-force-trauma impacts at 5J of energy. Fracture intensity increasing from left to right as defined by AOOTa compendium. (B) Aggregated data of fracture frequency from IAF or Multi-fragmentary (MF)-IAF induced in one limb bone (Tibia or Femur), both limb bones (Tibia and Femur) or non-articular fractures (non-AF, NF). (C) Fracture intensity scores by treatment group defined by AOOTa numerical classification. Values are mean  $\pm$  SD of n=6 animals per group. \* indicates  $P < 0.05$  for location (Tibia)
